# Supplementary material
Source: PubMed Central journal article supplement (PMC6133248)
Supplement: NIHMS949364-supplement-6.pdf [file NIHMS949364-supplement-6.pdf]

**Supplementary Material for:**

**Gcn4 binding in coding regions can activate internal and canonical 5'  
promoters in yeast**

**Yashpal Rawal<sup>1#</sup>, Răzvan V. Chereji<sup>2#</sup>, Vishalini Valabhoju<sup>1</sup>, Hongfang Qiu<sup>1</sup>, Josefina Ocampo<sup>2</sup>,  
David J. Clark<sup>2†</sup>, and Alan G. Hinnebusch<sup>1,†</sup>**

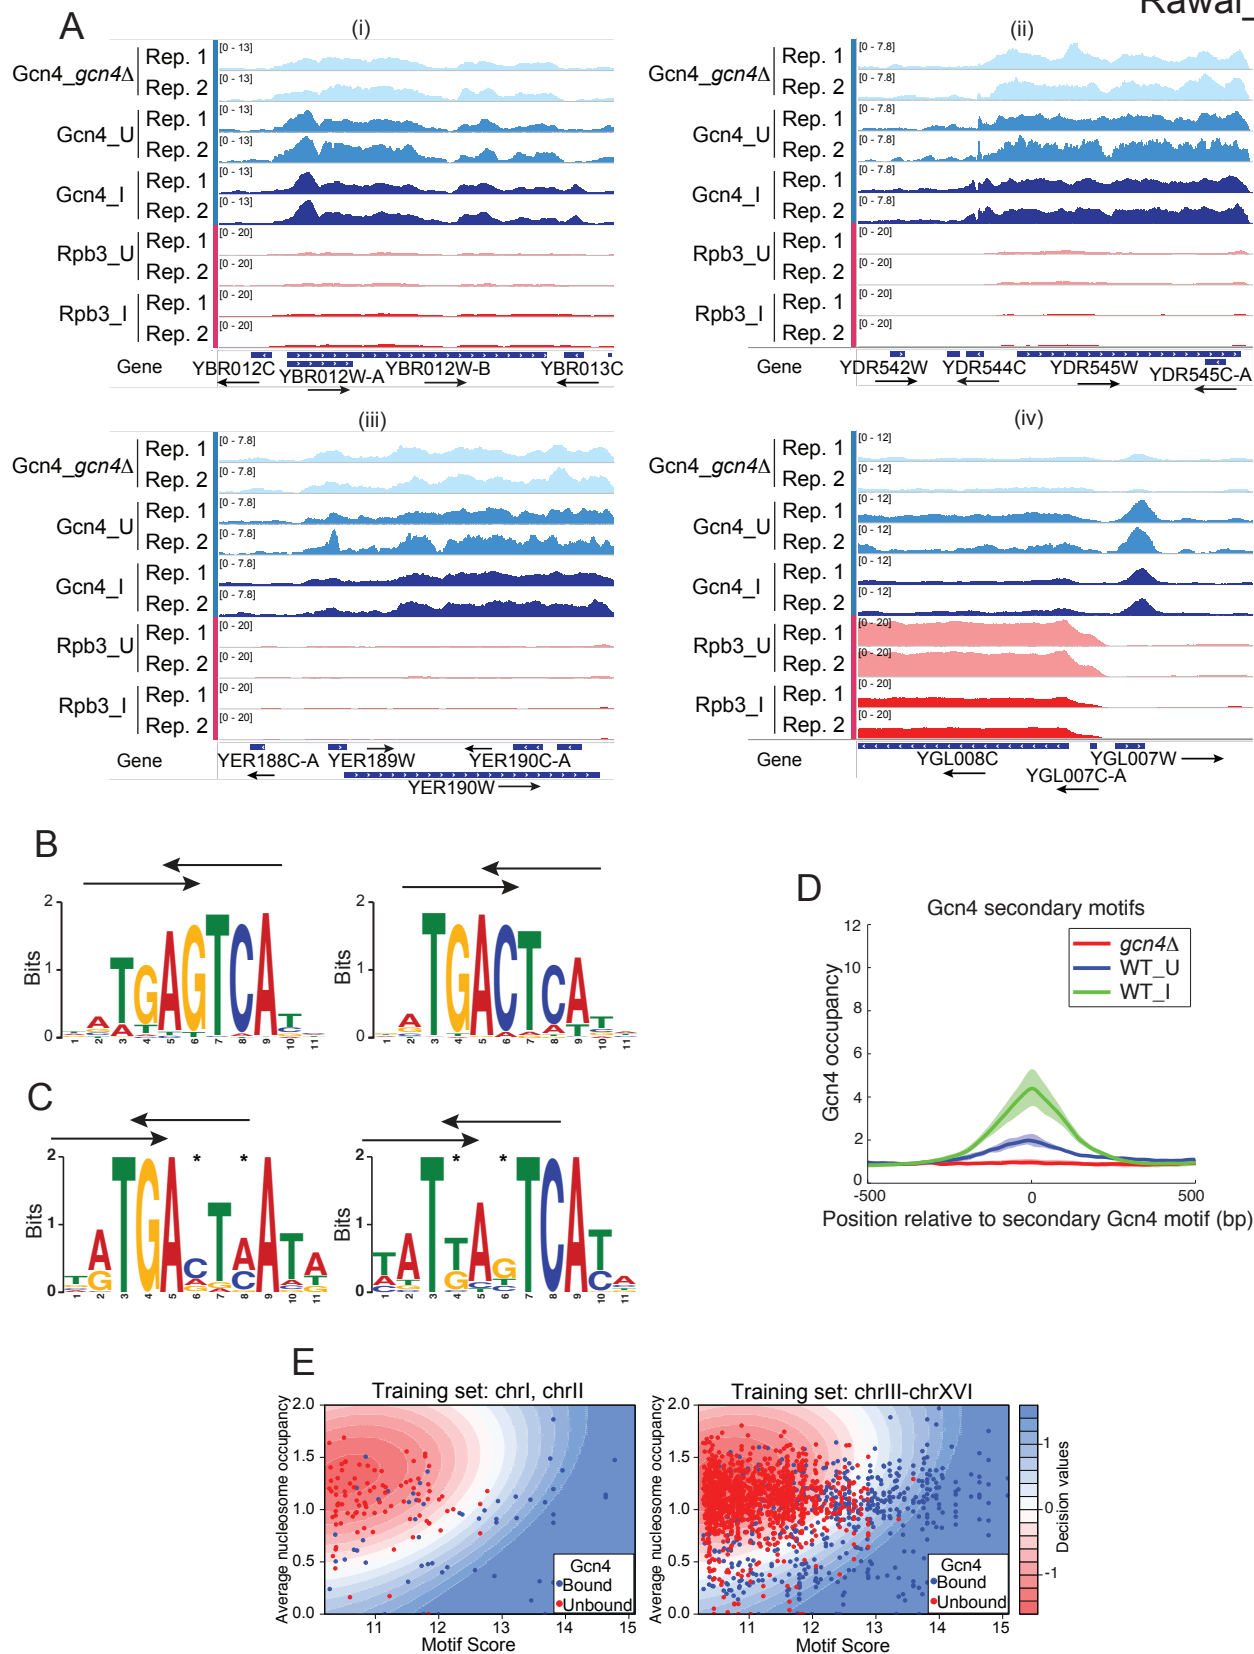

**Figure S1. Supporting analysis of ChIP-seq determination of genome-wide Gcn4 occupancies in vivo, related to Figure 1 (See legend on following page).**

**Figure S1. Supporting analysis of ChIP-seq determination of genome-wide Gcn4 occupancies in vivo, related to Figure 1.** (A) Examples of hyper-ChIPable regions showing non-specific occupancies in Gcn4 ChIP-seq. Gcn4 occupancies from *gcn4Δ* SM-induced (Gcn4\_ *gcn4Δ*), WT SM-induced (Gcn4\_I) or WT uninduced cells (Gcn4\_U) for two biological replicates (Rep.1, Rep.2) (tracks 1-6), or replicates of Rpb3 occupancies from the corresponding WT uninduced (Rpb3\_U) or SM-induced (Rpb3\_I) cells (tracks 7-10) plotted for the indicated genes using the Integrated Genomics Viewer (IGV). All profiles have been normalized such that the average occupancy for each chromosome equals one. (B) The consensus Gcn4 binding motif was discovered by MEME analysis of 546 sequences occupied by Gcn4 peaks. Forward strand (left); reverse strand (right). (C) Motifs discovered by MEME by analyzing 75 sequences occupied by Gcn4 peaks but lacking a strong match to the consensus sequence in (B): forward (left) and reverse strand (right). (D) Gcn4 occupancies at secondary motifs. Average Gcn4 occupancy for the 40 peaks containing a match to the secondary motif in (C). Different colors indicate the Gcn4 levels in WT cells before (WT\_U) and after (WT\_I) SM treatment, and in SM-treated *gcn4Δ* cells. The solid lines show the averages of multiple replicates (WT\_U – 3 replicates; WT\_I – 5 replicates; *gcn4Δ*– 3 replicates), and the shaded areas show the ranges of values for individual replicates. (E) Machine learning, using a type 1 support vector machine (SVM) algorithm, was used to classify the Gcn4 binding status of all predicted Gcn4 motifs, using as classification features the FIMO scores and average nucleosome occupancies of the corresponding genomic loci. All Gcn4 motifs on chromosomes I and II were used as training data, and the motifs from all other chromosomes were used to test the performance of the classification. The results of the training phase are arrayed in a plot of nucleosome occupancy versus FIMO score in which each sector is assigned a color-coded decision value (left). The decision values shown in different levels of red or blue, represent a measure of the distance from a test point to the curve separating the two classes of motifs; a positive value (blue background color) represents a predicted Gcn4-bound motif, while a negative value (red background color) represents a predicted Gcn4-unbound motif. The colors of the dots represent the true status of each Gcn4 motif: bound (blue dot) or unbound (red dot). According to the model, motifs with high FIMO scores are bound by Gcn4 regardless of nucleosome occupancy (far-right sectors), whereas motifs with low scores are bound only if nucleosome-free (lower-left sectors). The model succeeded in predicting the Gcn4 binding status of 83% of the motifs on the remaining 14 chromosomes (right), much greater than the percentage of all 1754 motifs identified experimentally as Gcn4-bound (31%). Thus, whereas a strong match to the consensus motif is the most important determinant of Gcn4 binding, motifs with inferior matches bind Gcn4 if located in sequences relatively depleted of nucleosomes. We attempted to identify other features that would improve the classification accuracy of the Gcn4 motifs, including accessibility to DNase I and occupancies of Abf1, H2A.Z, TBP and subunits of chromatin remodelers, but found only a marginal improvement of the classification accuracy using SVM (see Methods for further details).

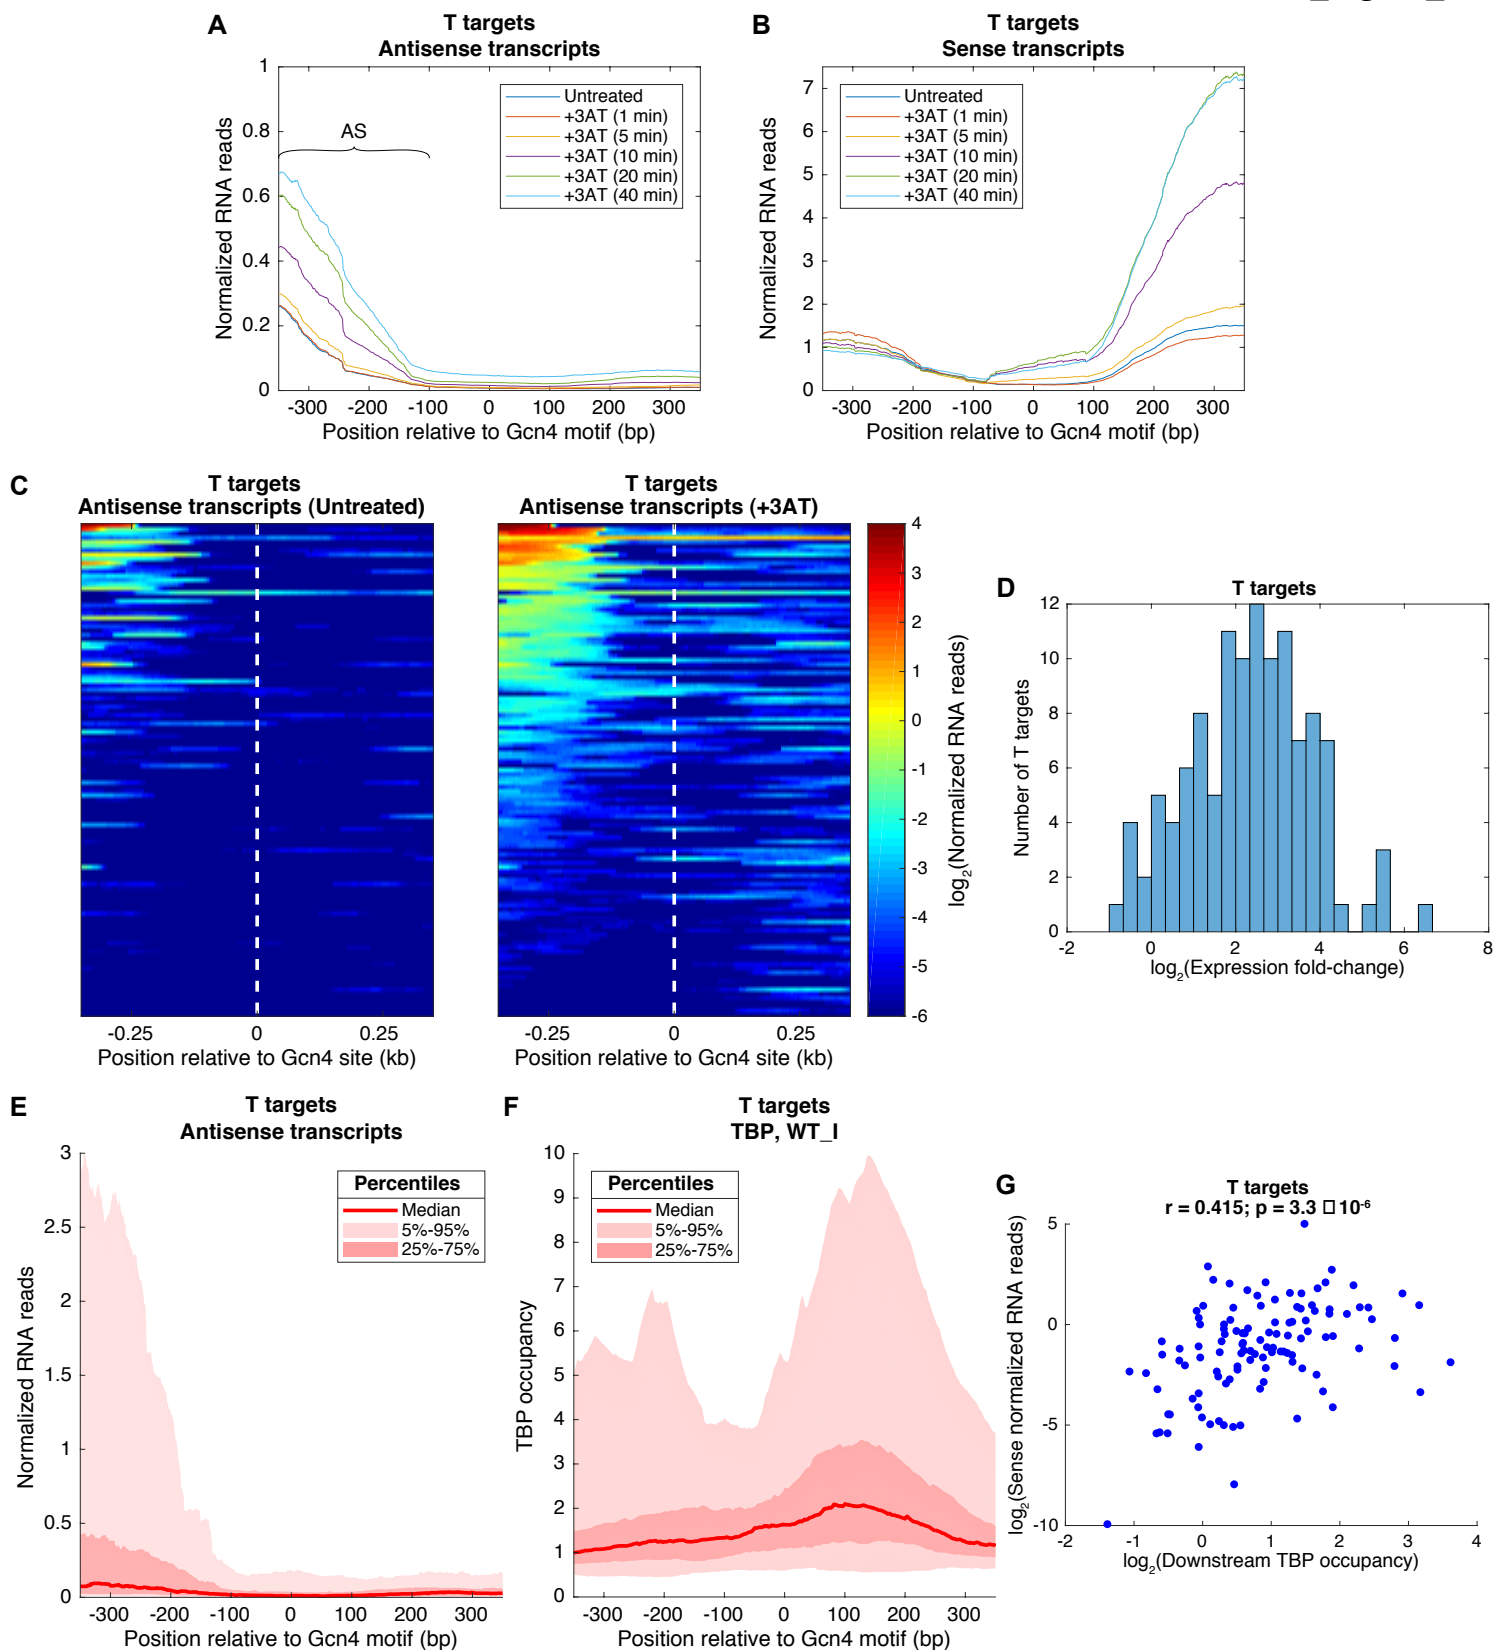

**Figure S2. Gcn4 binding to “T” targets also induces bidirectional transcription, related to Figure 5 (See legend on following page).**

**Figure S2. Gcn4 binding to “T” targets also induces bidirectional transcription, related to Figure 5.** (A-B) Average abundance of (A) AS and (B) sense transcripts initiated from the “T” targets, before and during a time course of 3AT treatment. Note that AS transcripts are ~10-fold less abundant than induced FL sense transcripts after 40 min of induction (panel B; note different y-axis scales in panels A-B). Low-level AS transcripts also map downstream of the Gcn4 motifs at T genes but they are not induced by 3-AT (A) and presumably derive from constitutive transcription of the non-coding strands of CDSs, possibly driven by transcriptional activators besides Gcn4. There are also uninduced sense transcripts mapping upstream of the Gcn4 motif (B) that most likely derive from constitutive transcription of adjacent upstream genes arranged in the same orientation as the induced T genes. (C) Heat maps showing the AS transcripts originating from all “T” targets, before (left panel) and after (right panel) 40 min. of 3AT treatment. The Gcn4 targets are sorted by the abundance of AS transcripts after induction. (D) Histogram of the AS expression fold-change for the “T” targets. All except seven “T” targets show an increase in antisense transcription ( $\log_2(\text{Fold-change}) > 0$ ). (E) Distribution of the abundance of AS transcripts, after 40 min. of 3AT treatment, depicted as in Fig. 5E. Although the median level of transcription (solid red line) is low, the top 25 percentiles (above the upper boundary between the light pink and dark pink shaded area, corresponding to the 75 percentiles) produce AS transcripts at an abundance comparable to the mean level of sense transcription shown in (B). (The RNA reads are normalized such that the genomic average RNA abundance is one). Light pink shaded area – the range between the 5-95 percentiles; dark pink shaded area – the range between the 25-75 percentiles. (F) TBP occupancy distribution near the “T” targets, depicted as in Fig. 5F. Light pink shaded area – the range between the 5-95 percentiles; dark pink shaded area – the range between the 25-75 percentiles; red line – median occupancy. (G) Scatter plot representing the  $\log_2$  normalized sense RNA reads in the 350bp regions downstream of the Gcn4 motifs versus the  $\log_2$  of the average occupancy of TBP in the same loci. Pearson correlation coefficient:  $r = 0.415$ . An F-test for a linear fit gives a p-value =  $3.3 \times 10^{-6}$ ; null hypothesis: coefficient of proportionality is equal to zero.

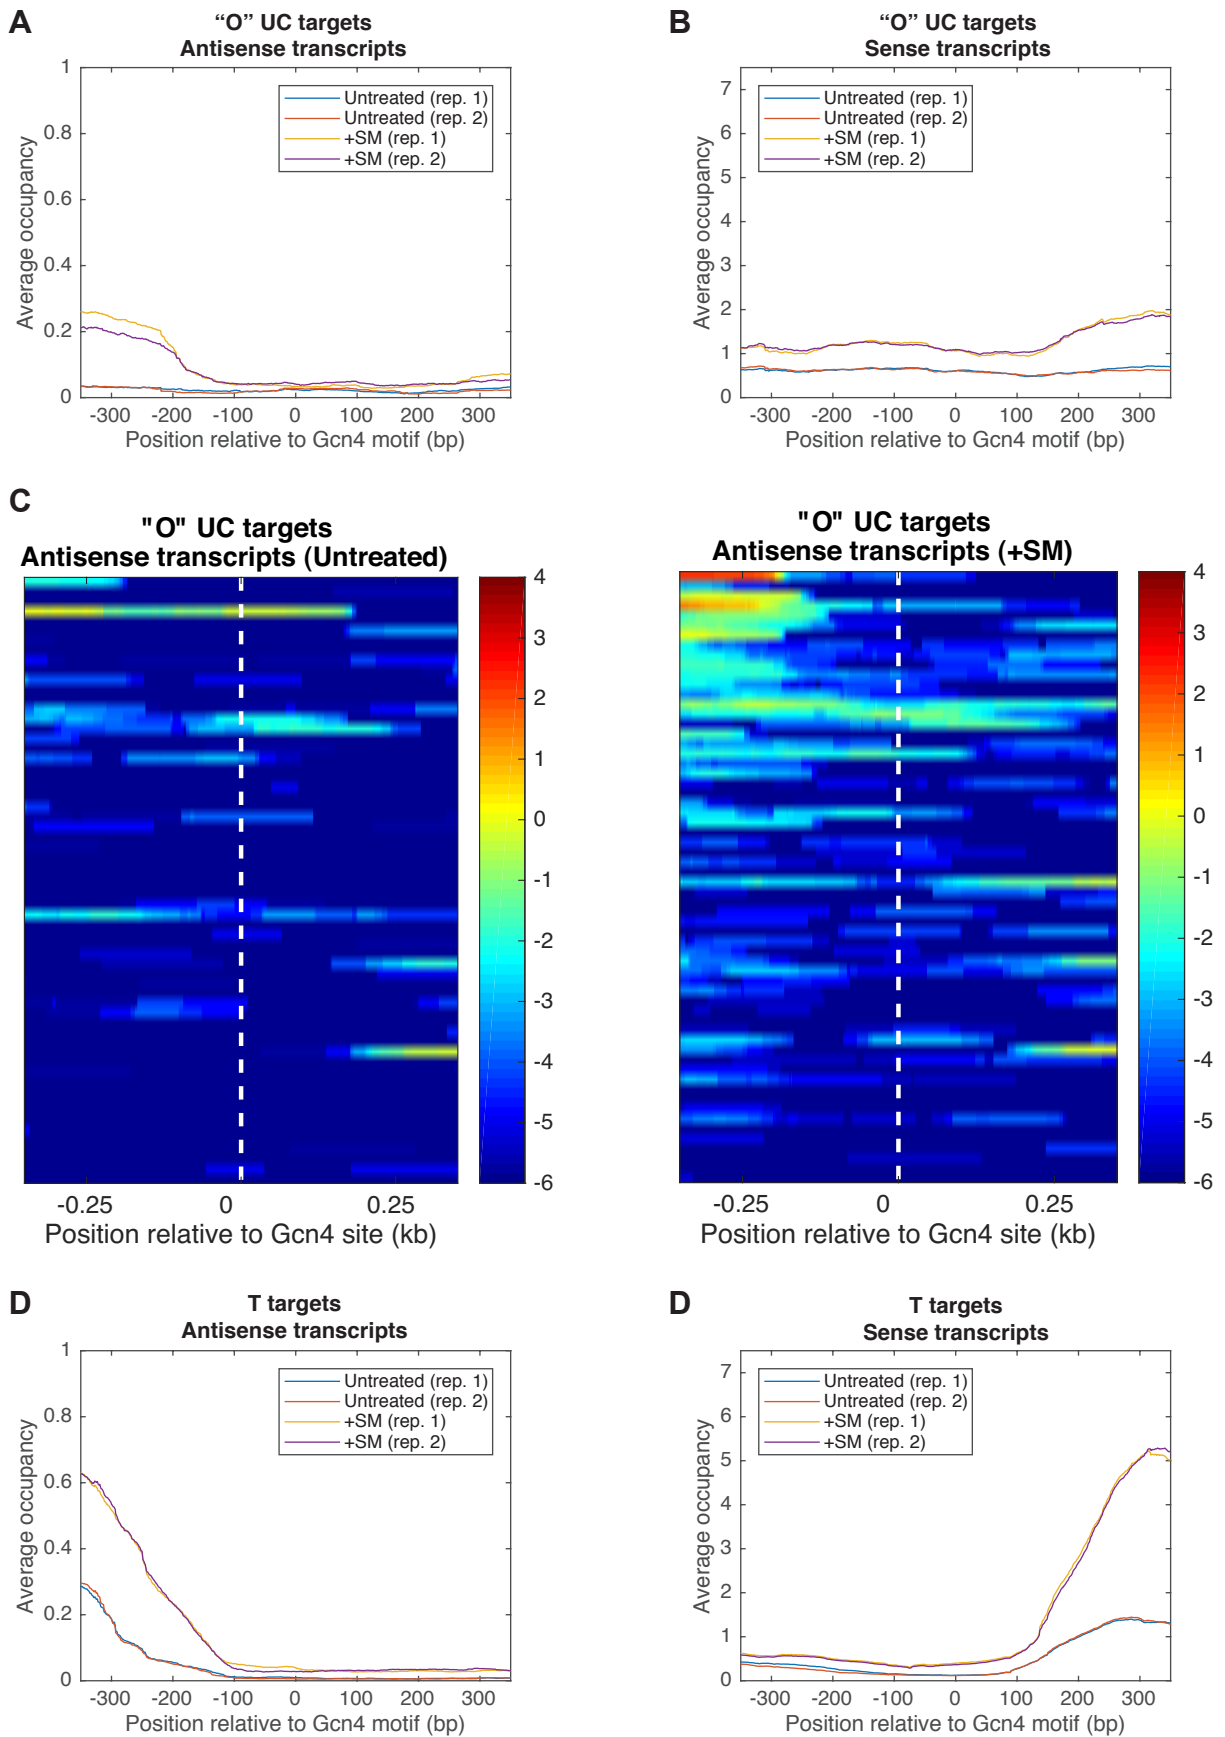

**Figure S3. Gcn4 binding on SM-treatment induces bidirectional transcription both within ORFs at "O" target genes and upstream of ORFs at "T" target genes, related to Figure 5 (See legend on following page).**

**Figure S3. Gcn4 binding on SM-treatment induces bidirectional transcription both within ORFs at “O” target genes and upstream of ORFs at “T” target genes, related to Figure 5.** (A-B) Average RNA read abundance for AS (A) or sense (B) transcripts surrounding Gcn4 motifs at the same group of induced “O” UC target genes analyzed in Fig. 5 for two biological replicates (reps. 1-2) of WT cells untreated or treated with SM. (C) Heat maps showing AS transcript abundance and position relative to Gcn4 motifs at the “O” UC targets, before (left panel) and after (right panel) SM treatment. (D-E) Average RNA read abundance for (D) AS and (E) sense transcripts initiated from the “T” targets, before and after SM treatment. Note that internal AS transcripts are ~5-fold less abundant than the induced FL sense transcripts at “O” UC target genes (A-B), and ~10-fold less abundant than the induced FL sense transcripts at “T” target genes (D-E), after SM treatment (note different y-axis scales in panels A & D vs. B & E).

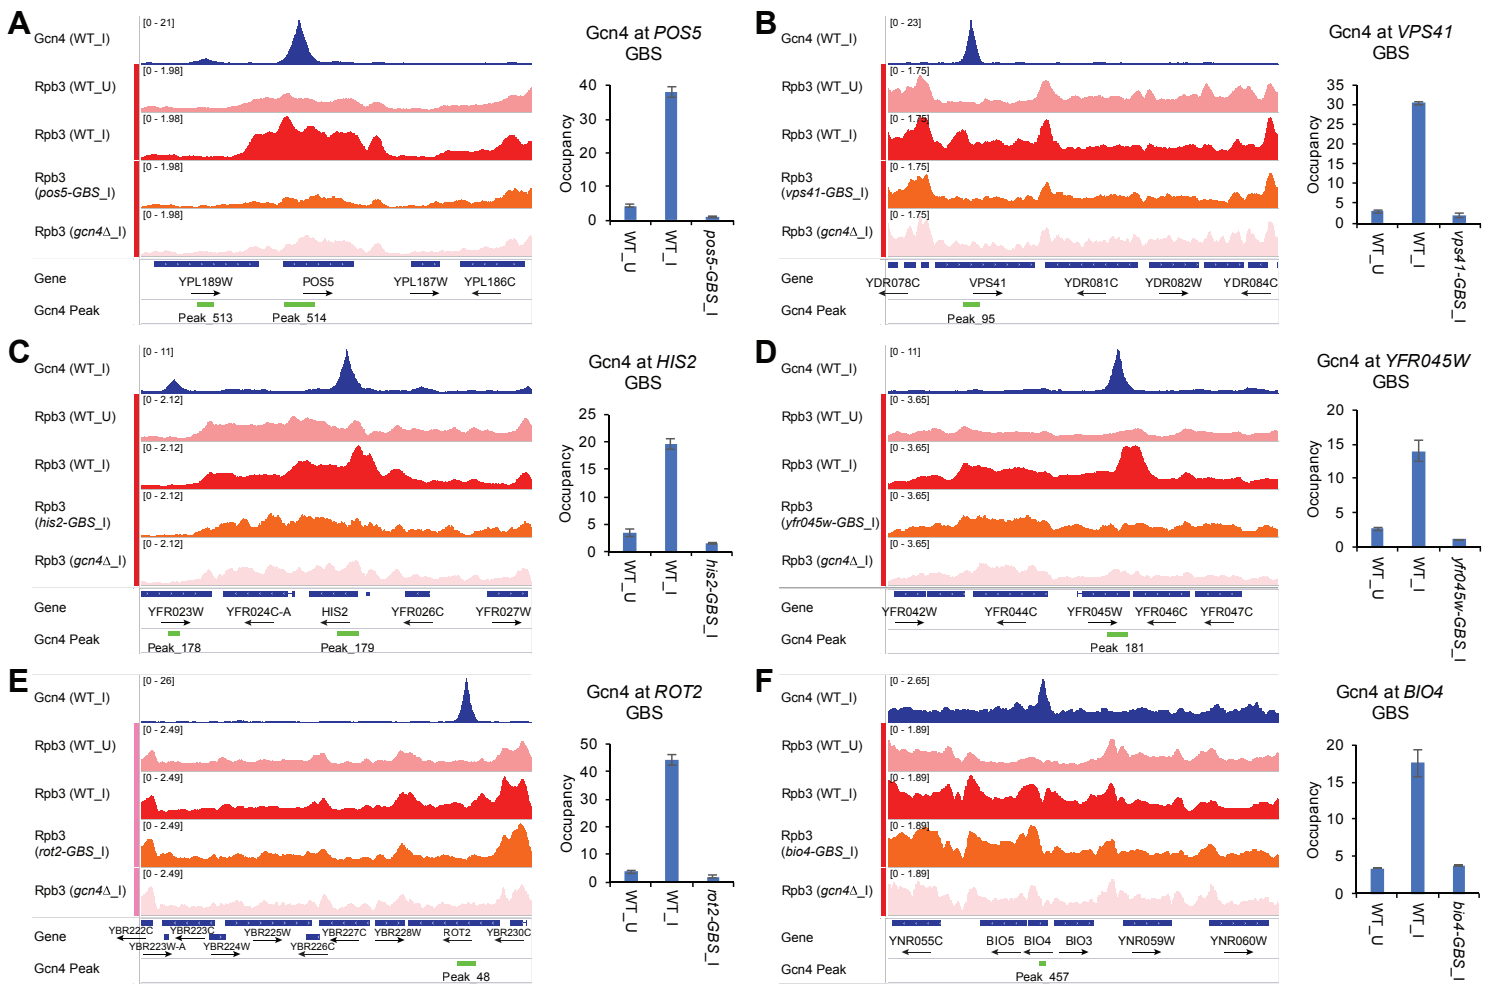

**Fig. S4: Eliminating Gcn4 binding sites in CDS reduces Gcn4 binding and diminishes Rpb3 occupancy across that gene but generally not in surrounding genes, related to Figure 7.** (A-F) left panels: SM-induced Gcn4 occupancy and Rpb3 occupancies in uninduced (<sub>U</sub>) or SM-induced (<sub>I</sub>) WT cells, SM-induced GBS mutant, and SM-treated *gcn4Δ* cells (*gcn4Δ*\_I), all plotted as in Fig. 1 for the indicated genes. Right panels: Relative Gcn4 occupancy, normalized to POL1 amplicon, determined in uninduced (<sub>U</sub>) or SM-induced (<sub>I</sub>) WT and SM-induced GBS mutant cells. Mean values ( $\pm$ SD) determined from two biological replicates. Note the exception case in (F) where mutation of the GBS within BIO4 reduced Rpb3 levels in the adjacent gene, BIO3, even though induction of BIO4 itself was not significantly reduced.



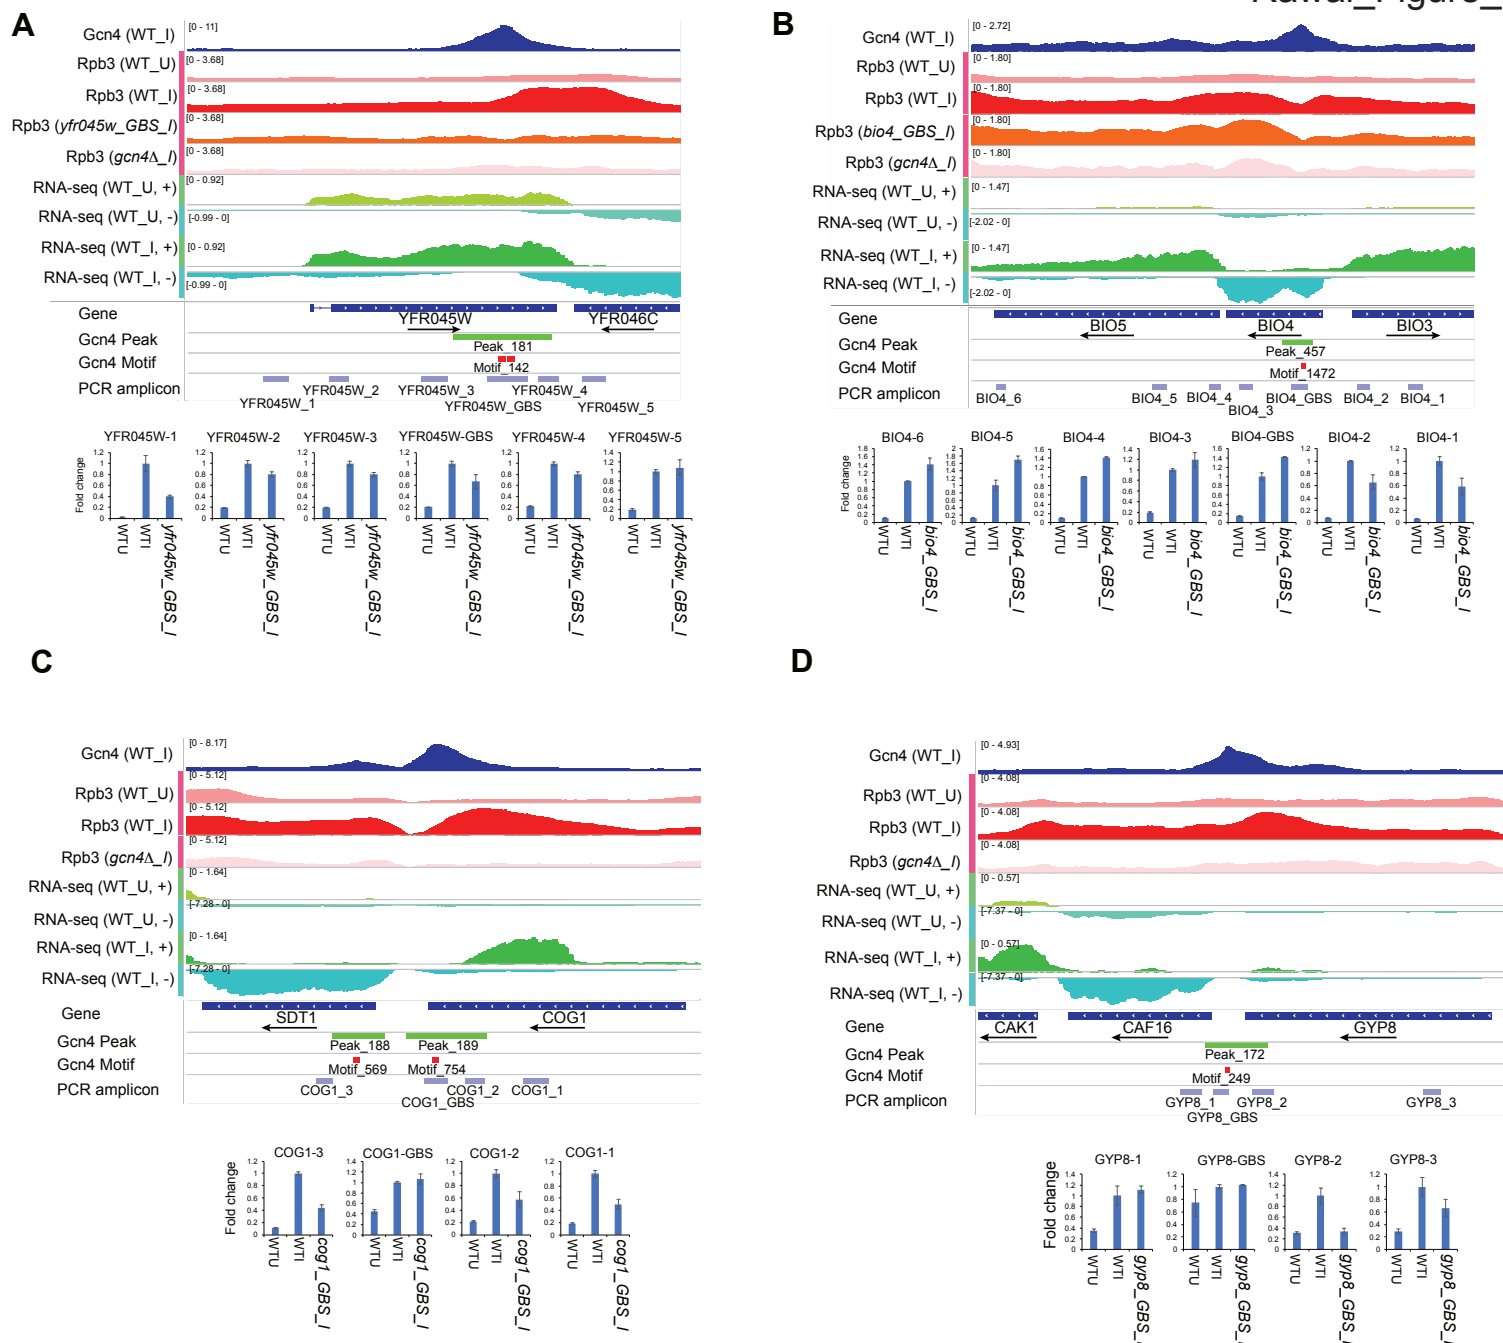

**Fig. S5. Elimination of internal Gcn4 binding sites reduces Rpb3\_I occupancies of the mutated CDS and SM-induced full-length and sub-genic transcripts at UC genes , related to Figure 1. (A-D) Gcn4 occupancies from SM-induced WT, Rpb3 occupancies from uninduced or SM-induced WT cells, SM-induced GBS mutant cells and *gcn4Δ* and RNA read densities from uninduced or 3AT-induced WT cells, all depicted as in Fig. 7. Below IGV tracks are locations of amplicons produced from total mRNA and quantified by qRT-PCR from uninduced (WT\_U) or SM-induced (WT\_I) WT cells, or SM-induced GBS mutant cells. Mean ( $\pm$ SD) relative mRNA levels, normalized to actin mRNA, were determined.**

**Table S1.** Multiple internal GBSs function in transcriptional activation, Related to Figure 7.

**Table S2.** Summary of effects of GBS mutations on full-length, AS, and SGS transcripts, related to Figure 7 and S5.

**Table S3.** Descriptions of ChIP-seq replicates, related to STAR methods.

**Table S4.** Yeast strains used in this study, related to STAR methods.

**Table S1. Multiple internal GBSs function in transcriptional activation**

| Genes containing GBSs            |                |                       | Normalized Rpb3 Occupancy |                  |             |               |                |                    |                    |
|----------------------------------|----------------|-----------------------|---------------------------|------------------|-------------|---------------|----------------|--------------------|--------------------|
|                                  |                |                       | WT_I<br>(n=25)            | GBS mut<br>(n=2) | P<br>value# | WT U          | <i>gcn4Δ</i> I | GBS-<br>mut I/WT I | <i>gcn4</i> I/WT I |
| 1. <i>YPL188W</i>                | <i>POS5</i>    | <i>YPL188W(POS5)</i>  | 1.31 ±0.27                | 0.44 ±0.004      | <0.001      | 0.59<br>±0.01 | 0.67<br>±0.07  | 0.335              | 0.509              |
| 2. <i>YDR080W</i>                | <i>VPS41</i>   | <i>YDR080W(VPS41)</i> | 0.66 ±0.10                | 0.40 ±0.02       | 0.002       | 0.42<br>±0.05 | 0.46<br>±0.02  | 0.609              | 0.703              |
| 3. <i>YFR025C</i>                | <i>HIS2</i>    | <i>YFR025C(HIS2)</i>  | 1.41 ±0.28                | 0.80 ±0.05       | 0.010       | 0.85<br>±0.05 | 0.88<br>±0.10  | 0.568              | 0.626              |
| 4. <i>YFR045W</i>                | <i>YFR045W</i> | <i>YFR045W</i>        | 1.82 ±0.30                | 0.90 ±0.07       | <0.001      | 0.67<br>±0.02 | 0.90<br>±0.07  | 0.493              | 0.497              |
| 5. <i>YBR229C</i>                | <i>ROT2</i>    | <i>YBR229C(ROT2)</i>  | 0.93 ±0.12                | 0.64 ±0.01       | 0.003       | 0.61<br>±0.01 | 0.62<br>±0.03  | 0.685              | 0.666              |
| 6. <i>YER037W</i>                | <i>PHM8</i>    | <i>YER037W(PHM8)</i>  | 2.73 ±0.51                | 2.34 ±0.03       | 0.332       | 0.97<br>±0.04 | 2.19<br>±0.29  | 0.855              | 0.802              |
| 7. <i>YBR166C</i>                | <i>TYR1</i>    | <i>YBR166C(TYR1)</i>  | 1.29 ±0.15                | 0.93 ±0.04       | 0.009       | 0.78<br>±0.01 | 0.76<br>±0.06  | 0.723              | 0.586              |
| 8. <i>YNR057C</i>                | <i>BIO4</i>    | <i>YNR057C(BIO4)</i>  | 1.44 ±0.18                | 1.20 ±0.05       | 0.062*      | 0.49<br>±0.06 | 0.79<br>±0.16  | 0.834              | 0.548              |
| 9. <i>YDL223C</i>                | <i>HBT1</i>    | <i>YDL223C(HBT1)</i>  | 1.40 ±0.37                | 1.17 ±0.22       | 0.446       | 0.50<br>±0.03 | 0.73<br>±0.14  | 0.837              | 0.521              |
| 10. <i>YDR380W</i>               | <i>ARO10</i>   | <i>YDR380W(ARO10)</i> | 4.63 ±1.01                | 3.91 ±0.15       | 0.363       | 0.84<br>±0.01 | 2.45<br>±0.41  | 0.844              | 0.529              |
| 11. <i>YIL112W</i>               | <i>HOS4</i>    | <i>YIL112W(HOS4)</i>  | 1.27 ±0.09                | 1.13 ±0.03       | 0.0456*     | 0.92<br>±0.03 | 1.01<br>±0.01  | 0.894              | 0.798              |
| 12. <i>YOR230W</i>               | <i>WTM1</i>    | <i>YOR230W(WTM1)</i>  | 2.95 ±0.40                | 2.88 ±0.01       | 0.782       | 1.21<br>±0.04 | 2.63<br>±0.27  | 0.977              | 0.891              |
| <b>Adjacent to Genes w/ GBSs</b> |                |                       |                           |                  |             |               |                |                    |                    |
| 13. <i>YFR044C</i>               | <i>YFR044C</i> | <i>YFR045W</i>        | 1.72 ±0.12                | 1.54 ±0.07       | 0.0442      | 0.79<br>±0.03 | 1.37<br>±0.25  | 0.897              | 0.794              |
| 14. <i>YFR046C</i>               | <i>CNN1</i>    | <i>YFR045W</i>        | 1.49 ±0.19                | 0.96 ±0.02       | 0.001       | 0.71<br>±0.09 | 0.86<br>±0.02  | 0.645              | 0.573              |
| 15. <i>YBR228W</i>               | <i>SLX1</i>    | <i>YBR229C(ROT2)</i>  | 0.90 ±0.08                | 0.75 ±0.05       | 0.028       | 0.72<br>±0.03 | 0.79<br>±0.04  | 0.832              | 0.879              |
| 16. <i>YBR230C</i>               | <i>OM14</i>    | <i>YBR229C(ROT2)</i>  | 2.28 ±0.40                | 2.15 ±0.08       | 0.664       | 1.34<br>±0.12 | 1.38<br>±0.12  | 0.941              | 0.603              |

**Table S1. (cont'd)**

|                      |                  |                       |                |             |       |               |               |       |       |
|----------------------|------------------|-----------------------|----------------|-------------|-------|---------------|---------------|-------|-------|
| 17. <i>YBR165W</i>   | <i>UBS1</i>      | <i>YBR166C(TYR1)</i>  | 1.390<br>±0.16 | 0.913 ±0.02 | 0.001 | 0.80<br>±0.08 | 0.91<br>±0.09 | 0.657 | 0.653 |
| 18. <i>YBR167C</i>   | <i>POP7</i>      | <i>YBR166C(TYR1)</i>  | 1.53 ±0.15     | 1.49 ±0.04  | 0.707 | 1.00<br>±0.06 | 1.09<br>±0.10 | 0.972 | 0.710 |
| 19. <i>YNR056C</i>   | <i>BIO5</i>      | <i>YNR057C(BIO4)</i>  | 1.06 ±0.14     | 1.10 ±0.001 | 0.713 | 0.39<br>±0.02 | 0.68<br>±0.08 | 1.038 | 0.636 |
| 20. <i>YNR058W</i>   | <i>BIO3</i>      | <i>YNR057C(BIO4)</i>  | 0.90 ±0.14     | 0.69 ±0.03  | 0.029 | 0.34<br>±0.02 | 0.57<br>±0.02 | 0.762 | 0.630 |
| 21. <i>YDL222C</i>   | <i>FMP45</i>     | <i>YDL223C(HBT1)</i>  | 3.03 ±0.82     | 2.64 ±0.40  | 0.550 | 0.82<br>±0.06 | 1.41<br>±0.43 | 0.872 | 0.466 |
| 22. <i>YDR379C-A</i> | <i>YDR379C-A</i> | <i>YDR380W(ARO10)</i> | 1.94 ±0.26     | 1.90 ±0.16  | 0.867 | 0.93<br>±0.05 | 1.53<br>±0.22 | 0.982 | 0.788 |
| 23. <i>YIL113W</i>   | <i>SDPI</i>      | <i>YIL112W(HOS4)</i>  | 1.23 ±0.20     | 1.10 ±0.19  | 0.432 | 0.60<br>±0.06 | 1.00<br>±0.10 | 0.895 | 0.813 |
| 24. <i>YIL111W</i>   | <i>COX5B</i>     | <i>YIL112W(HOS4)</i>  | 2.95 ±0.30     | 2.88 ±0.17  | 0.782 | 2.16<br>±0.18 | 2.69<br>±0.15 | 0.977 | 0.913 |

#Assigned with 2-tailed, unpaired t-test comparing 2 replicate results for each GBS mutant to either 2 replicates each of the other 11 GBS mutants plus 3 WT\_I replicates (25 control replicates in total) (\*), or to all 27 replicate results including that GBS mutant.

Table S2. Summary of effects of *-GBS* mutations on full-length, AS, and SGS transcripts<sup>1</sup>

|             | Name/Location of Amplicons |                     |                  |                 |                       |                  |               |                |
|-------------|----------------------------|---------------------|------------------|-----------------|-----------------------|------------------|---------------|----------------|
|             | Spanning GBS               | Upstream of the GBS |                  |                 | Downstream of the GBS |                  |               |                |
| Amplicons   | POS5 GBS                   | POS5_1              |                  |                 | POS5_2                |                  |               |                |
| % WT I-WT U | 28.02 ±1.92 **             | 1.21 ±0.03 ***      |                  |                 | 23.8 ±0.30 **         |                  |               |                |
| Amplicons   | HIS2 GBS                   | HIS2_1              |                  |                 | HIS2_2                | HIS2_3           |               |                |
| % WT I-WT U | 51.05 ±8.35 *              | 12.45 ±2.14 **      |                  |                 | 66.34 ±0 *            | 55.38 ±3.25 **   |               |                |
| Amplicons   | SPO21_GBS                  | SPO21_1             |                  |                 | SPO21_2               | SPO21_3          |               |                |
| % WT I-WT U | 90.77 ±22.87               | 8.8 ±6.16 ***       |                  |                 | 7.069 ±1.68 ***       | 26.58±10.68 ***  |               |                |
| Amplicons   | COG1-GBS                   | COG1-1              | COG1-2           |                 | COG1-3                |                  |               |                |
| % WT I-WT U | 112.35 ±17.49              | 38.55 ±12.78 ***    | 45.94 ±12.78 *** |                 | 36.83 ±4.95 ***       |                  |               |                |
| Amplicons   | GYP8-GBS                   | GYP8-1              | GYP8-2           |                 | GYP8-3                |                  |               |                |
| % WT I-WT U | 112.95 ±1.98               | 116.26 ±13.09       | 4.152 ±7.84 ***  |                 | 54.51 ±28.22 *        |                  |               |                |
| Amplicons   | SOL1-GBS                   | SOL1-1              | SOL1-2           |                 | SOL1-3                |                  |               |                |
| % WT I-WT U | 46.73 ±11.01 ***           | 14.29 ±4 ***        | 48.98 ±36.75 *   |                 | 56.79 ±21.69 **       |                  |               |                |
| Amplicons   | VPS41_GBS                  | VPS41_1             | VPS41_2          |                 | VPS41_3               | VPS41_4          |               |                |
| % WT I-WT U | 60.67 ±0.54 **             | 39.32 ±0.62 **      | 26.93 ±5.94 **   |                 | 38.29 ±11.80 **       | 60.81 ±12.80 *   |               |                |
| Amplicons   | HMG2-GBS                   | HMG2-1              | HMG2-2           | HMG2-3          | HMG2-4                |                  |               |                |
| % WT I-WT U | 79.035 ±20.3               | 78.66 ±6.48 ***     | 74.70 ±19.17     | 76.31 ±35.16    | 56.016 ±22.99**       |                  |               |                |
| Amplicons   | YFR045w_GBS                | YFR045w_1           | YFR045w_2        | YFR045w_3       | YFR045w_4             | YFR045w_5        |               |                |
| % WT I-WT U | 58.82 ±16.23 *             | 38.71 ±2.7 *        | 75.55 ±5.89 *    | 75.11 ±5.12 *   | 75.26 ±5.32 *         | 109.82 ±20.19    |               |                |
| Amplicons   | ROT2_GBS                   | ROT2_1              | ROT2_2           | ROT2_3          | ROT2_4                | ROT2_5           |               |                |
| % WT I-WT U | 35.94 ±25.32 *             | 69.37 ±21.43 **     | 38.63 ±8.67      | -37.23 ±9.45 ** | 50.46 ±35.18          | 39.71 ±35.78     |               |                |
| Amplicons   | BIO4-GBS                   | BIO4_1              | BIO4-2           |                 | BIO4-3                | BIO4-4           | BIO4-5        | BIO4-6         |
| % WT I-WT U | 149.87 ±0.41 **            | 52.78 ±23.6 **      | 62.8 ±27.99 *    |                 | 123.57 ±16.9          | 146.02 ±1.15 *** | 178.9 ±10.3 * | 146.86 ±15.95* |

<sup>1</sup>Summary of qRT-PCR analysis of mRNA expression changes conferred by the indicated GBS mutations. For each *-GBS* mutant allele, 3 or more amplicons quantified by qRT-PCR to probe transcription (i) spanning the GBS, which should quantify primarily FL transcripts; (ii) upstream of the GBS, to quantify AS transcripts; (iii) downstream of the GBS, to quantify SGS transcripts. The cell below the label of each amplicon gives the percentage of the difference in mRNA expression between induced and uninduced conditions in the *-GBS* mutant versus WT, expressed as a percentage of the WT difference, calculated as follows: (i)  $A = (\text{Mean\_WT\_I}) - (\text{Mean\_WT\_U})$ , calculated from the mean values determined from two or more biological replicates of WT\_I and WT\_U total RNA samples; (ii)  $B_n = (\text{GBS\_I})_n - \text{Mean\_WT\_U}$  (calculated for biological replicates  $n = 1, 2, \dots, 4$  of the *-GBS* mutant); (iii)  $C_n = (B_n/A) \times 100$ ; (iv)  $\%(\text{WT\_I-WT\_U}) = \text{Mean } C_n (\pm \text{Average deviation})$ . A two-tailed Student's t-test was conducted to determine whether the mean of  $C_n$  values calculated for the *-GBS* mutant from  $n$  replicates differs significantly from the mean of  $C_n$  values calculated from  $n$  replicates of the WT strain.

\*  $P \leq 0.05$ , \*\*  $P \leq 0.01$  and \*\*\*  $P \leq 0.001$ .

Table S3. Descriptions of ChIP-seq replicates

| Genotype                | ChIP         | Sample Name | PE reads | PE rmdup reads | Pearson correlation between replicates |          |            |          |
|-------------------------|--------------|-------------|----------|----------------|----------------------------------------|----------|------------|----------|
|                         |              |             |          |                | AGH24 05                               | AGH24 06 | AGH32 86   | AGH32 87 |
| BY4741 I                | Gcn4 I       | AGH24 04    | 13142345 | 501413         | 0.9775                                 | 0.9796   | 0.9424     | 0.9452   |
| BY4741 I                | Gcn4 I       | AGH24 05    | 13309102 | 443492         |                                        | 0.9764   | 0.937      | 0.9412   |
| BY4741 I                | Gcn4 I       | AGH24 06    | 15050690 | 446177         |                                        |          | 0.9427     | 0.9458   |
| BY4741 I                | Gcn4 I       | AGH32 86    | 11022951 | 1462391        |                                        |          |            | 0.9959   |
| BY4741 I                | Gcn4 I       | AGH32 87    | 10329576 | 1086737        |                                        |          |            |          |
|                         |              |             |          |                | AGH32 HQ46                             |          | AGH32 HQ47 |          |
| BY4741 U                | Gcn4 U       | AGH32 HQ45  | 9434957  | 834910         | 0.9972                                 |          | 0.9967     |          |
| BY4741 U                | Gcn4 U       | AGH32 HQ46  | 8293362  | 352621         |                                        |          | 0.9958     |          |
| BY4741 U                | Gcn4 U       | AGH32 HQ47  | 6312086  | 223598         |                                        |          |            |          |
|                         |              |             |          |                | AGH24 02                               |          | AGH24 03   |          |
| gcn4Δ I                 | Gcn4 I       | AGH24 01    | 9956992  | 807437         | 0.9771                                 |          | 0.9753     |          |
| gcn4Δ I                 | Gcn4 I       | AGH24 02    | 12785177 | 522922         |                                        |          | 0.969      |          |
| gcn4Δ I                 | Gcn4 I       | AGH24 03    | 8469126  | 235539         |                                        |          |            |          |
|                         |              |             |          |                | AGH12-02                               |          | AGH23-11   |          |
| gcn4Δ I                 | Rpb3 I-1     | AGH12-01    | 13200360 | 8404587        | 0.9911                                 |          | 0.8895     |          |
| gcn4Δ I                 | Rpb3 I-2     | AGH12-02    | 12475932 | 7843968        |                                        |          | 0.8891     |          |
| gcn4Δ I                 | Rpb3 I-3     | AGH23-11    | 8667515  | 1858940        |                                        |          |            |          |
|                         |              |             |          |                | Replicate 2                            |          |            |          |
| rot2-GBS I              | Rpb3 I-1     | AGH85-01    | 21939943 | 8660775        | 0.9871                                 |          |            |          |
| rot2-GBS I              | Rpb3 I-2     | AGH85-02    | 23462617 | 5818055        |                                        |          |            |          |
| hbt1-GBS I              | Rpb3 I-1     | AGH85-03    | 12628893 | 3455163        | 0.9878                                 |          |            |          |
| hbt1-GBS I              | Rpb3 I-2     | AGH85-04    | 21413927 | 6530496        |                                        |          |            |          |
| vps41-GBS I             | Rpb3 I-1     | AGH85-05    | 14653698 | 4922416        | 0.989                                  |          |            |          |
| vps41-GBS I             | Rpb3 I-2     | AGH85-06    | 24355045 | 7729944        |                                        |          |            |          |
| aro10-GBS I             | Rpb3 I-1     | AGH85-07    | 19695500 | 3631346        | 0.9798                                 |          |            |          |
| aro10-GBS I             | Rpb3 I-2     | AGH85-08    | 14365583 | 6765744        |                                        |          |            |          |
| phm8-GBS I              | Rpb3 I-1     | AGH85-09    | 21902229 | 3327726        | 0.9753                                 |          |            |          |
| phm8-GBS I              | Rpb3 I-2     | AGH85-10    | 30995106 | 3954872        |                                        |          |            |          |
| his2-GBS I              | Rpb3 I-1     | AGH85-11    | 24430264 | 2285433        | 0.9686                                 |          |            |          |
| his2-GBS I              | Rpb3 I-2     | AGH85-12    | 9198411  | 1134697        |                                        |          |            |          |
| yfr045w-GBS I           | Rpb3 I-1     | AGH86-01    | 10550130 | 2197196        | 0.9814                                 |          |            |          |
| yfr045w-GBS I           | Rpb3 I-2     | AGH86-02    | 14987193 | 3271705        |                                        |          |            |          |
| hos4-GBS I              | Rpb3 I-1     | AGH86-03    | 14196735 | 2976920        | 0.9717                                 |          |            |          |
| hos4-GBS I              | Rpb3 I-2     | AGH86-04    | 9939528  | 4868827        |                                        |          |            |          |
| wtm1-GBS I              | Rpb3 I-1     | AGH86-07    | 13315018 | 4018608        | 0.9762                                 |          |            |          |
| wtm1-GBS I              | Rpb3 I-2     | AGH86-08    | 6491683  | 3617616        |                                        |          |            |          |
| pos5-GBS I              | Rpb3 I-1     | AGH86-09    | 11600154 | 2483310        | 0.9526                                 |          |            |          |
| pos5-GBS I              | Rpb3 I-2     | AGH86-10    | 11911824 | 3778767        |                                        |          |            |          |
| tyr1-GBS I              | Rpb3 I-1     | AGH94-05    | 22507027 | 17095399       | 0.9934                                 |          |            |          |
| tyr1-GBS I              | Rpb3 I-2     | AGH94-06    | 26417337 | 20048682       |                                        |          |            |          |
| bio4-GBS I              | Rpb3 I-1     | AGH94-07    | 25093873 | 19596202       | 0.9929                                 |          |            |          |
| bio4-GBS I              | Rpb3 I-2     | AGH94-08    | 21617804 | 16770972       |                                        |          |            |          |
| TBP-myc <sub>13</sub> U | Myc U-1      | AGH84-01    | 23867690 | 17101713       | 0.998                                  |          |            |          |
| TBP-myc <sub>13</sub> U | Myc U-2      | AGH84-02    | 29431993 | 22193596       |                                        |          |            |          |
| TBP-myc <sub>13</sub> I | Myc I-1      | AGH84-05    | 26549545 | 19424748       | 0.9995                                 |          |            |          |
| TBP-myc <sub>13</sub> U | Myc I-2      | AGH84-06    | 28039770 | 19832697       |                                        |          |            |          |
| BY4741 U                | Mnase-H3 U-1 | AGH68-01    | 21155789 | 16387173       | 0.9862                                 |          |            |          |
| BY4741 U                | Mnase-H3 U-2 | AGH73-02    | 33931620 | 20843860       |                                        |          |            |          |
| BY4741 I                | Mnase-H3 I-1 | AGH68-03    | 22985503 | 17204691       | 0.9866                                 |          |            |          |
| BY4741 I                | Mnase-H3 I-2 | AGH68-04    | 19959153 | 15376225       |                                        |          |            |          |

Table S4. Yeast strains used in this study

| Strain Name      | Parent | Genotype                                                                              | Motif sequences replaced                                             | Source                  |
|------------------|--------|---------------------------------------------------------------------------------------|----------------------------------------------------------------------|-------------------------|
| F729/<br>BY4741  | NA     | <i>MATa his3Δ1 leu2Δ0 met15Δ0 ura3Δ0</i>                                              | NA                                                                   | Research genetics       |
| F731             | BY4741 | <i>MATa his3Δ1 leu2Δ0 met15Δ0 ura3Δ0 gcn4Δ::kanMX4</i>                                | NA                                                                   | Research genetics       |
| HQY366/<br>H3256 | BY4741 | <i>MATa his3Δ1 leu2Δ0 met15Δ0 ura3Δ0 SPT15-myc<sub>13</sub>::HIS3MX6</i>              | NA                                                                   | Qiu et al., 2004<br>MCB |
| YDC111           | NA     | <i>MATa ade2-1 can1-100 leu2-3,112 trp1-1 ura3-1</i>                                  | NA                                                                   | Kim et al., 2006        |
| YR201            | BY4741 | <i>MATa his3Δ1 leu2Δ0 met15Δ0 ura3Δ0 tyr1-GBS::P<sub>GALI</sub>SCE1-hyg-KIURA3</i>    | TCTGAGTCATT                                                          | This study              |
| YR202            | BY4741 | <i>MATa his3Δ1 leu2Δ0 met15Δ0 ura3Δ0 rot2-GBS::P<sub>GALI</sub>SCE1-hyg-KIURA3</i>    | GATGACTCATT                                                          | This study              |
| YR203            | BY4741 | <i>MATa his3Δ1 leu2Δ0 met15Δ0 ura3Δ0 hbt1-GBS::P<sub>GALI</sub>SCE1-hyg-KIURA3</i>    | AATGACTCACG                                                          | This study              |
| YR204            | BY4741 | <i>MATa his3Δ1 leu2Δ0 met15Δ0 ura3Δ0 vps41-GBS::P<sub>GALI</sub>SCE1-hyg-KIURA3</i>   | TATGAGTCATT                                                          | This study              |
| YR205            | BY4741 | <i>MATa his3Δ1 leu2Δ0 met15Δ0 ura3Δ0 aro10-GBS::P<sub>GALI</sub>SCE1-hyg-KIURA3</i>   | GATGAGTCAAA                                                          | This study              |
| YR206            | BY4741 | <i>MATa his3Δ1 leu2Δ0 met15Δ0 ura3Δ0 phm8-GBS::P<sub>GALI</sub>SCE1-hyg-KIURA3</i>    | TATGAGTCAGA                                                          | This study              |
| YR207            | BY4741 | <i>MATa his3Δ1 leu2Δ0 met15Δ0 ura3Δ0 his2-GBS::P<sub>GALI</sub>SCE1-hyg-KIURA3</i>    | CATGAGTCATG                                                          | This study              |
| YR208            | BY4741 | <i>MATa his3Δ1 leu2Δ0 met15Δ0 ura3Δ0 yfr045w-GBS::P<sub>GALI</sub>SCE1-hyg-KIURA3</i> | <sup>1</sup> AATGACTCAGCCCAT<br>GACGTCGTA AAAACAA<br>GGATGATGAGTCAAA | This study              |
| YR209            | BY4741 | <i>MATa his3Δ1 leu2Δ0 met15Δ0 ura3Δ0 hos4-GBS::P<sub>GALI</sub>SCE1-hyg-KIURA3</i>    | GCTGACTCACC                                                          | This study              |
| YR211            | BY4741 | <i>MATa his3Δ1 leu2Δ0 met15Δ0 ura3Δ0 bio4-GBS::P<sub>GALI</sub>SCE1-hyg-KIURA3</i>    | ATTGAGTCAGA                                                          | This study              |
| YR212            | BY4741 | <i>MATa his3Δ1 leu2Δ0 met15Δ0 ura3Δ0 wtm1-GBS::P<sub>GALI</sub>SCE1-hyg-KIURA3</i>    | TGTGACTCACA                                                          | This study              |
| YR214            | BY4741 | <i>MATa his3Δ1 leu2Δ0 met15Δ0 ura3Δ0 pos5-GBS::P<sub>GALI</sub>SCE1-hyg-KIURA3</i>    | CATGAGTCATA                                                          | This study              |
| VV 001           | BY4741 | <i>MATa his3Δ1 leu2Δ0 met15Δ0 ura3Δ0 hmg2-GBS::P<sub>GALI</sub>SCE1-hyg-KIURA3</i>    | TATGACTCACAAC                                                        | This study              |
| VV 002           | BY4741 | <i>MATa his3Δ1 leu2Δ0 met15Δ0 ura3Δ0 gyp8-GBS::P<sub>GALI</sub>SCE1-hyg-KIURA3</i>    | GATGACTCAAA                                                          | This study              |
| VV 003           | BY4741 | <i>MATa his3Δ1 leu2Δ0 met15Δ0 ura3Δ0 cog1-GBS::P<sub>GALI</sub>SCE1-hyg-KIURA3</i>    | CAATTAGTCATC                                                         | This study              |
| VV 004           | BY4741 | <i>MATa his3Δ1 leu2Δ0 met15Δ0 ura3Δ0 soll1-GBS::P<sub>GALI</sub>SCE1-hyg-KIURA3</i>   | GATGAGTCATT                                                          | This study              |
| VV 005           | BY4741 | <i>MATa his3Δ1 leu2Δ0 met15Δ0 ura3Δ0 spo21-GBS::P<sub>GALI</sub>SCE1-hyg-KIURA3</i>   | AATGAGTCAT                                                           | This study              |
| YR216            | YR201  | <i>MATa his3Δ1 leu2Δ0 met15Δ0 ura3Δ0 tyr1-GBS::BamHI</i>                              | TCTGAGTCATT                                                          | This study              |
| YR217            | YR202  | <i>MATa his3Δ1 leu2Δ0 met15Δ0 ura3Δ0 rot2-GBS::BamHI</i>                              | GATGACTCATT                                                          | This study              |
| YR218            | YR203  | <i>MATa his3Δ1 leu2Δ0 met15Δ0 ura3Δ0 hbt1-GBS::BamHI</i>                              | AATGACTCACG                                                          | This study              |
| YR219            | YR204  | <i>MATa his3Δ1 leu2Δ0 met15Δ0 ura3Δ0 vps41-GBS::BamHI</i>                             | TATGAGTCATT                                                          | This study              |
| YR220            | YR205  | <i>MATa his3Δ1 leu2Δ0 met15Δ0 ura3Δ0 aro10-GBS::BamHI</i>                             | GATGAGTCAAA                                                          | This study              |
| YR221            | YR206  | <i>MATa his3Δ1 leu2Δ0 met15Δ0 ura3Δ0 phm8-GBS::BamHI</i>                              | TATGAGTCAGA                                                          | This study              |
| YR222            | YR207  | <i>MATa his3Δ1 leu2Δ0 met15Δ0 ura3Δ0 his2-GBS::BamHI</i>                              | CATGAGTCATG                                                          | This study              |
| YR223            | YR208  | <i>MATa his3Δ1 leu2Δ0 met15Δ0 ura3Δ0 yfr045w-GBS::BamHI</i>                           | <sup>1</sup> AATGACTCAGCCCAT<br>GACGTCGTA AAAACAA<br>GGATGATGAGTCAAA | This study              |
| YR224            | YR209  | <i>MATa his3Δ1 leu2Δ0 met15Δ0 ura3Δ0 hos4-GBS::BamHI</i>                              | GCTGACTCACC                                                          | This study              |
| YR226            | YR211  | <i>MATa his3Δ1 leu2Δ0 met15Δ0 ura3Δ0 bio4-GBS::BamHI</i>                              | ATTGAGTCAGA                                                          | This study              |
| YR227            | YR212  | <i>MATa his3Δ1 leu2Δ0 met15Δ0 ura3Δ0 wtm1-GBS::BamHI</i>                              | TGTGACTCACA                                                          | This study              |
| YR229            | YR214  | <i>MATa his3Δ1 leu2Δ0 met15Δ0 ura3Δ0 pos5-GBS::BamHI</i>                              | CATGAGTCATA                                                          | This study              |
| VV 006           | VV 001 | <i>MATa his3Δ1 leu2Δ0 met15Δ0 ura3Δ0 hmg2-GBS::BamHI</i>                              | TATGACTCACAAC                                                        | This study              |

|        |        |                                                           |              |            |
|--------|--------|-----------------------------------------------------------|--------------|------------|
| VV 007 | VV 002 | <i>MATa his3Δ1 leu2Δ0 met15Δ0 ura3Δ0 gyp8-GBS::BamHI</i>  | GATGACTCAA   | This study |
| VV 008 | VV 003 | <i>MATa his3Δ1 leu2Δ0 met15Δ0 ura3Δ0 cog1-GBS::BamHI</i>  | CAATTAGTCATC | This study |
| VV 009 | VV 004 | <i>MATa his3Δ1 leu2Δ0 met15Δ0 ura3Δ0 sol1-GBS::BamHI</i>  | GATGAGTCATT  | This study |
| VV 010 | VV 005 | <i>MATa his3Δ1 leu2Δ0 met15Δ0 ura3Δ0 spo21-GBS::BamHI</i> | AATGAGTCAT   | This study |

<sup>1</sup> Two motifs highlighted in bold.
